# Supplementary material for: Transcriptional CDK Inhibitors CYC065 and THZ1 Induce Apoptosis in Glioma Stem Cells Derived from Recurrent GBM
Source: MDPI journal article supplement (doi:10.3390/cells10051182), 2021-05-12
Supplement: s1 [file s1]

Supplemental Material for

# Transcriptional CDK inhibitors CYC065 and THZ1 induce apoptosis in glioma stem cells derived from recurrent GBM

By

Viktorija Juric <sup>1</sup>, Heiko Düssmann <sup>1,2</sup>, Martine L.M. Lamfers <sup>3</sup>, Jochen H.M. Prehn <sup>1,2</sup>, Markus Rehm <sup>4,5</sup>, Brona M. Murphy <sup>1,\*</sup>

\* Correspondence: bronomurphy@rcsi.com (B.M.M.)

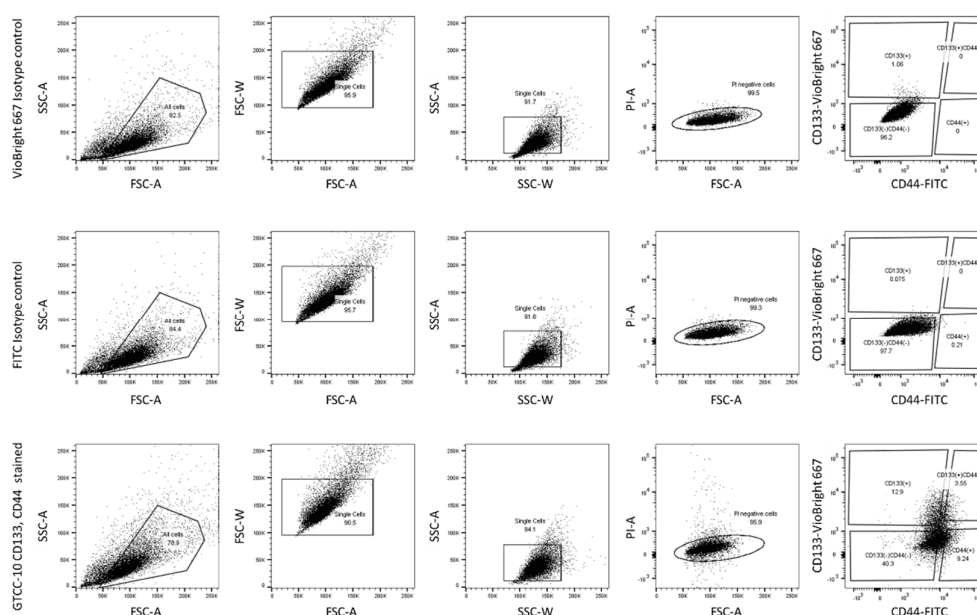

**Figure S1.** Gate settings for the CD133-biomarker positive and CD44-biomarker positive GSCs (FACS analysis). IgG1-VioBright 667 (upper panel) and IgG1-FITC (middle panel) used to set up the gates for CD133-positive and CD44-positive subpopulations in GTCC-10 cells. GTCC-10 cells stained with anti-CD133-VioBright 667 and anti-CD44-FITC markers (lower panel).

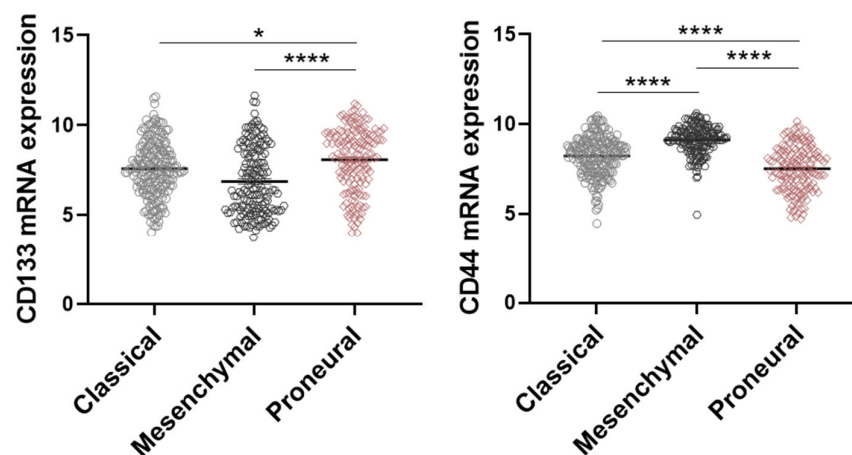

**Figure S2.** CD133 and CD44 mRNA expression in different subtypes of GBM. TCGA-GBM dataset was used to compare the expression of CD133 (left panel) and CD44 (right panel) between different subtypes of GBM. One-way ANOVA with post-hoc Tukey's analysis was used for statistical analysis, whereby, \* $<0.05$ , \*\*\*\* $p<0.0001$ .

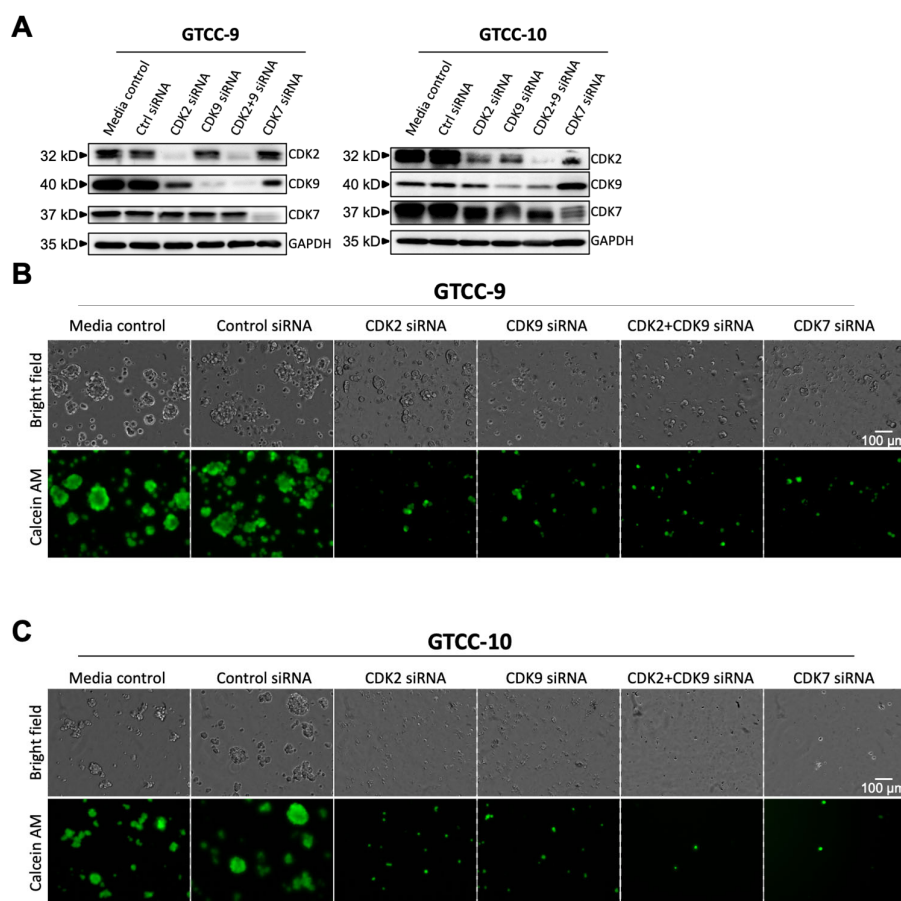

**Figure S3.** Genetic depletion of CDK2/9 or 7 cause viability loss in recurrent gliomaspheres. **(A)** Western blot analysis of GTCC-9 (left panel) and GTCC-10 (right panel) gliomaspheres were transfected with scrambled control siRNA (20 nM), Cdk2 and/or 9, 7-targeting siRNAs (20 nM) (as indicated). GAPDH was used as a loading control. Western blot analysis was performed in n=3 biological replicates and representative blots are shown here. **(B, C)** Morphological features and Calcein-AM staining of gliomaspheres with indicated genetic depletions. Images were taken with a Nikon Eclipse TE 300 inverted microscope, equipped with an 20x/0.45 NA objective and the appropriate filter cube for Calcein-AM (scale bar = 100  $\mu$ m). N=3 independent experiments performed in triplicate for each condition.

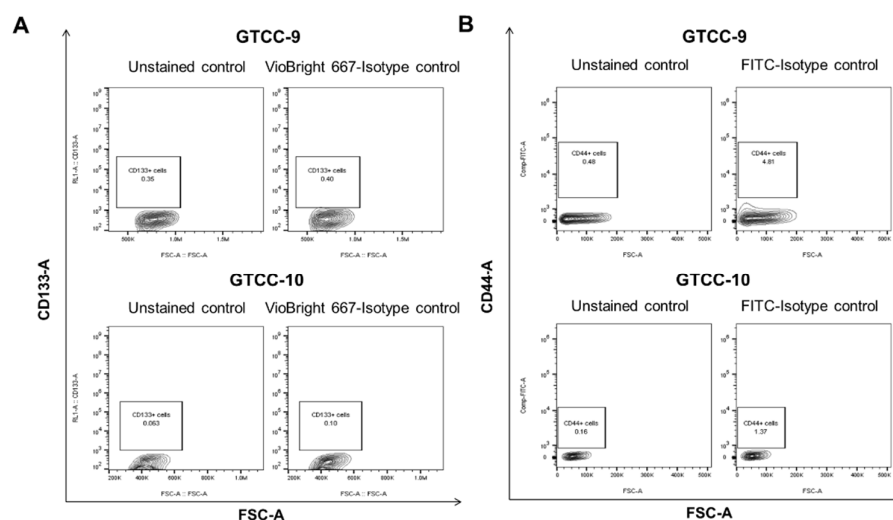

**Figure S4.** Gate settings for the CD133-biomarker positive and CD44-biomarker positive GSCs. **(A,B)** Unstained cells and corresponding isotype control stained cells were used to set up the gates for CD133- and CD44-positive cells in Figure 5.

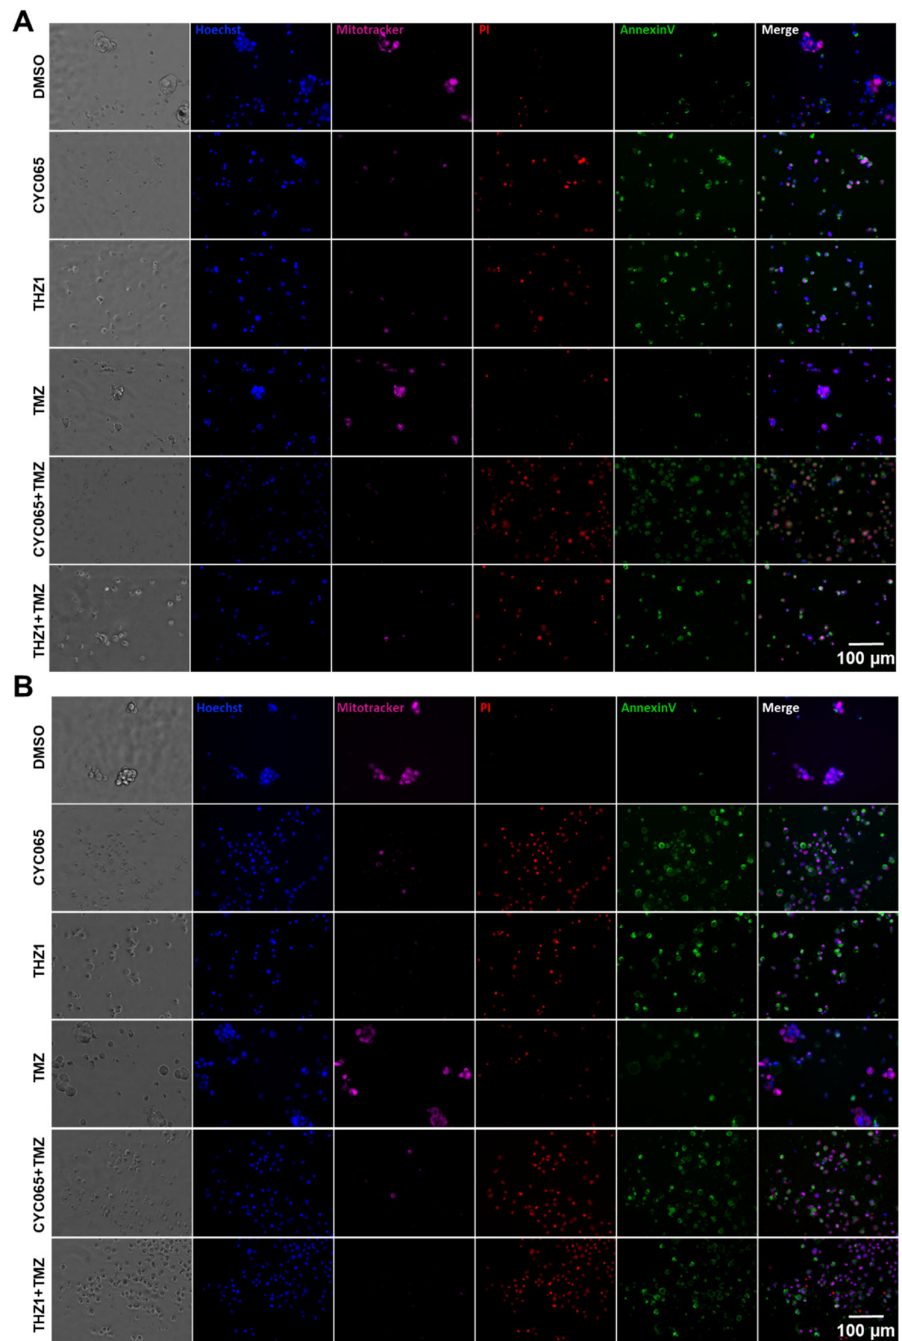

**Figure S5.** CYC065 and THZ1 induce apoptotic cell death in CD133 and CD44 GSC biomarker-negative subpopulations and CD133 and CD44 GSC biomarker-positive subpopulations in recurrent GTCC-10 gliomaspheres. **(A)** CD133, CD44-negative subpopulation of GTCC-10 gliomaspheres and **(B)** CD133, CD44-positive subpopulation of GTCC-10 gliomaspheres. Sorted subpopulations were treated with DMSO, 150 μM TMZ, 3 μM CYC065 or 100 nM THZ1 alone or pre-treated with TMZ (150 μM, 24 h) and imaged 120 h after treatment. Scale bar = 100 μm; n=3 independent experiments were performed.
